# Supplementary material for: Biofilm-Induced Type 2 Innate Immunity in a Cystic Fibrosis Model of Pseudomonas aeruginosa
Source: PubMed Central journal article supplement (PMC5478716; doi:10.3389/fcimb.2017.00274), 2017-06-21
Supplement: Image1.pdf [file Image1.pdf]

## Supplementary Material

### Biofilm-induced type 2 innate immunity in a cystic fibrosis model of *Pseudomonas aeruginosa*

Kenny Bielen<sup>1,2</sup>, Bart 'S Jongers<sup>1</sup>, Jan Boddaert<sup>1</sup>, Tom K Raju<sup>1</sup>, Christine Lammens<sup>2</sup>, Surbhi Malhotra-Kumar<sup>2</sup>, Philippe G Jorens<sup>3</sup>, Herman Goossens<sup>2</sup>, Samir Kumar-Singh<sup>1,2\*</sup>

#### \*Correspondence:

Corresponding author mailing address: Prof. dr. S. Kumar-Singh, MD, PhD, Molecular Pathology Group, Laboratory of Cell Biology and Histology, Faculty of Medicine and Health Sciences – D.T.1.32, University of Antwerp, Universiteitsplein 1, B-2610 Wilrijk, Belgium. Phone: 32-3-265-3329. E-mail: samir.kumarsingh@uantwerpen.be

#### SI Figure 1. Neutrophil infiltration in sterile bead and Pa-bead instilled animals

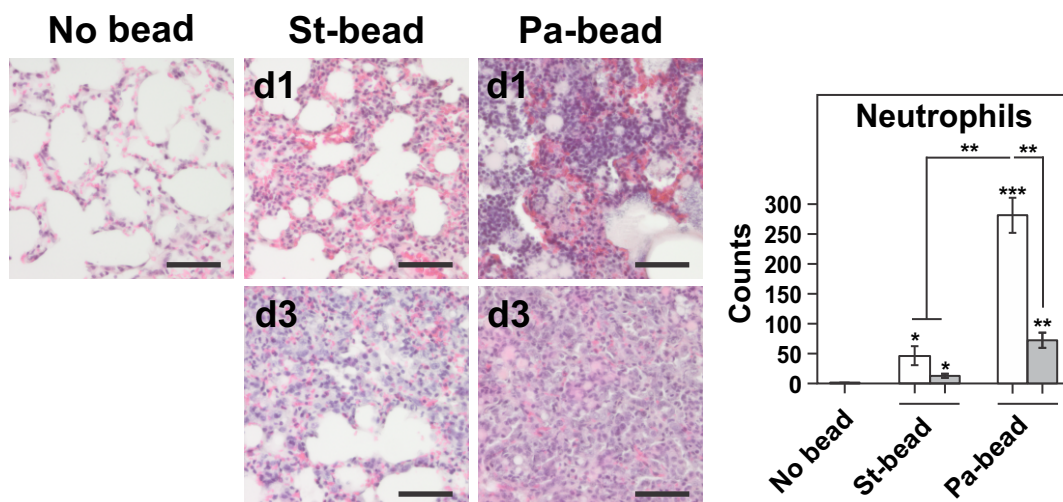

Representative images for H&E stained sections showing neutrophil infiltration for control animals (No bead), sterile agar (St-) bead instilled animals and *P. aeruginosa* loaded (Pa-) bead instilled animals showing increased influx of neutrophils on H&E stain. Scale bar represents 60  $\mu$ m. Data is presented as averages  $\pm$  SEM, n = 4 - 6 animals per group. Asterisk above the vertical bars denotes significance against No bead control group.
