# Supplementary material for: Biofilm-Induced Type 2 Innate Immunity in a Cystic Fibrosis Model of Pseudomonas aeruginosa
Source: PubMed Central journal article supplement (PMC5478716; doi:10.3389/fcimb.2017.00274), 2017-06-21
Supplement: Image2.pdf [file Image2.pdf]

*Supplementary Material*

**Biofilm-induced type 2 innate immunity in a cystic fibrosis model of *Pseudomonas aeruginosa***

Kenny Bielen<sup>1,2</sup>, Bart 'S Jongers<sup>1</sup>, Jan Boddaert<sup>1</sup>, Tom K Raju<sup>1</sup>, Christine Lammens<sup>2</sup>, Surbhi Malhotra-Kumar<sup>2</sup>, Philippe G Jorens<sup>3</sup>, Herman Goossens<sup>2</sup>, Samir Kumar-Singh<sup>1,2\*</sup>

**\*Correspondence:**

Corresponding author mailing address: Prof. dr. S. Kumar-Singh, MD, PhD, Molecular Pathology Group, Laboratory of Cell Biology and Histology, Faculty of Medicine and Health Sciences – D.T.1.32, University of Antwerp, Universiteitsplein1, B-2610 Wilrijk, Belgium. Phone: 32-3-265-3329. E-mail: samir.kumarsingh@uantwerpen.be

**SI Figure 2. Survival and clinical follow up for sterile bead and *P. aeruginosa* loaded bead instilled animals**

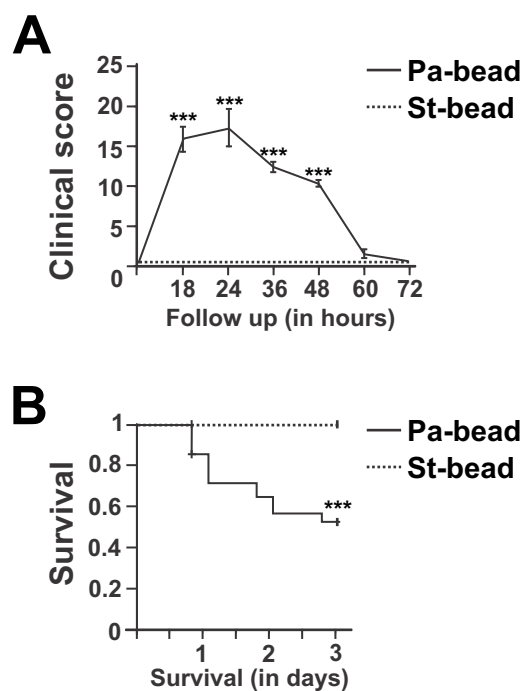

(A) *P. aeruginosa* (Pa)-bead model showed gradual disease progression measured using scoring scheme shown in SI Table 1 (\*\*\*)  $P < 0.001$ ).

(B) Pa-bead model showed higher mortality (Kaplan-Meier, \*\*\*)  $P < 0.001$ , Mantel-Cox log rank test) compared to sterile (St) bead instilled animals.

A–B Data from 67 animals (n = 52 for Pa-bead, n = 15 for St-bead groups) was available to estimate disease progression and survival.
